# Supplementary material for: 3D hierarchical self-supported NiO/Co3O4@C/CoS2 nanocomposites as electrode materials for high-performance supercapacitors
Source: PubMed Central journal article supplement — Nanoscale Adv. 2020 May 1;2(7):2785–91. doi: 10.1039/d0na00013b (PMC9417718; doi:10.1039/d0na00013b), 2020-05-01
Supplement: NA-002-D0NA00013B-s001.pdf [file NA-002-D0NA00013B-s001.pdf]

## Electronic Supplementary Information

3D hierarchical self-supported NiO/Co<sub>3</sub>O<sub>4</sub>@C/CoS<sub>2</sub> nanocomposites as electrode materials for high-performance supercapacitor

Xingxing Zhu,<sup>a</sup> Mengyao Sun,<sup>b</sup> Rui Zhao,<sup>a</sup> Yingqi Li,<sup>ac</sup> Bo Zhang,<sup>a</sup> Yingli Zhang,<sup>a</sup> Xingyou Lang,<sup>a</sup> Yongfu Zhu,<sup>\*a</sup> Qing Jiang<sup>a</sup>

<sup>a</sup> *Key Laboratory of Automobile Materials, Ministry of Education (Jilin University), School of Materials Science and Engineering, Jilin University, Changchun 130022, China.*

<sup>b</sup> *School of Materials Science and Engineering, Fudan University, Shanghai 200433, China.*

<sup>c</sup> *College of Materials Science and Engineering, Jilin Jianzhu University, Changchun 130118, China.*

*\*Corresponding author Email: yfzhu@jlu.edu.cn*

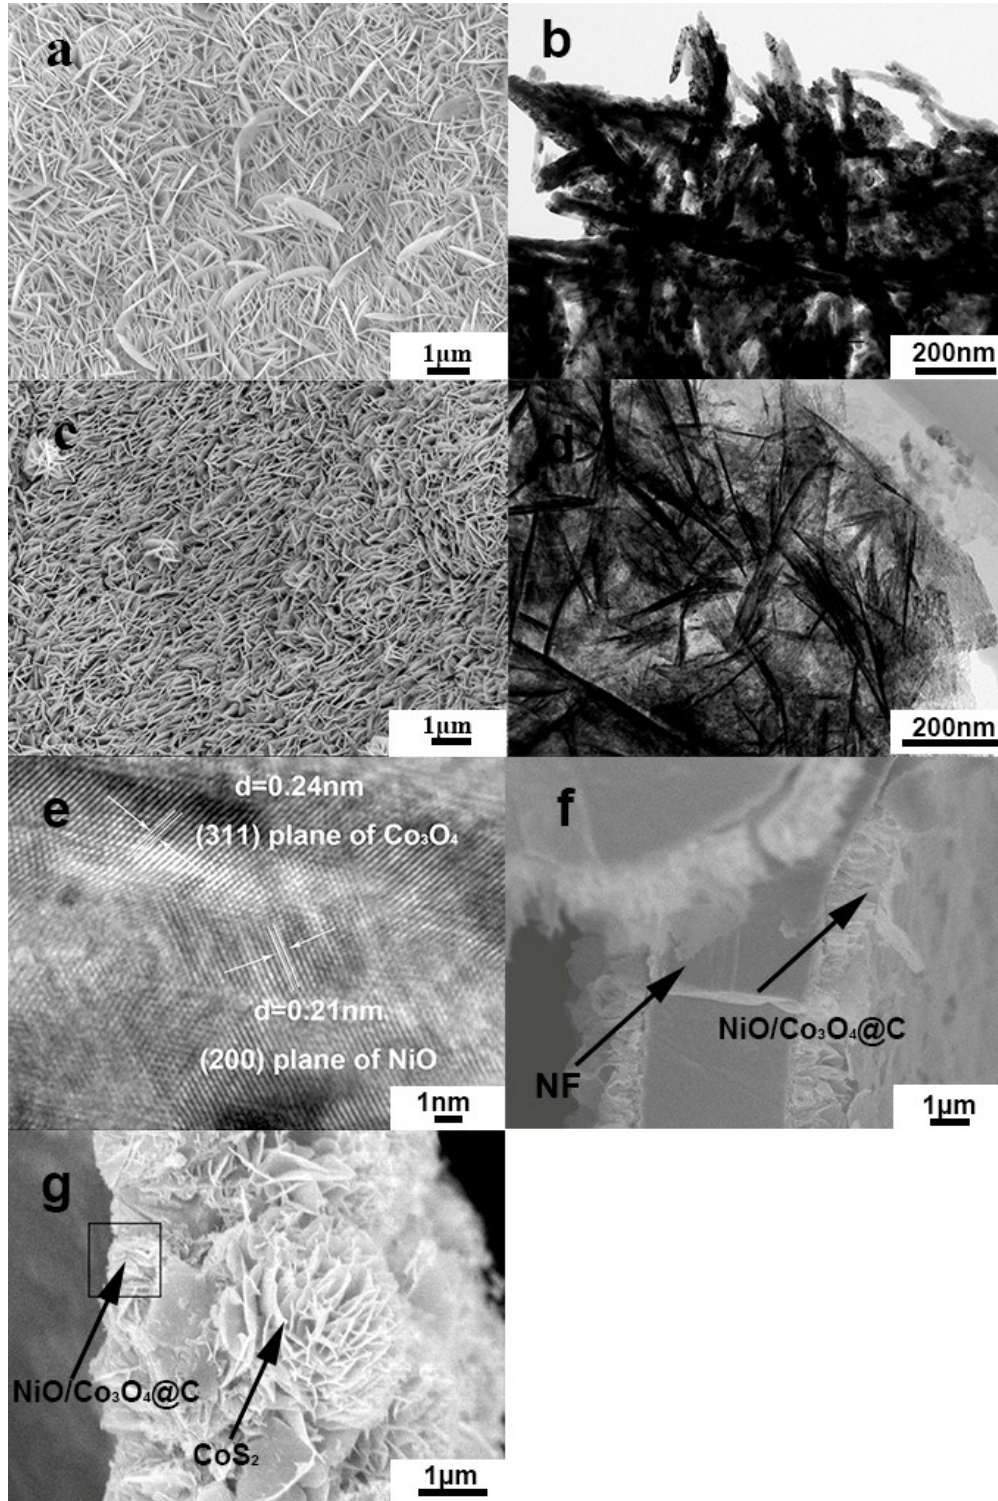

**Fig. S1.** (a) The typical SEM image of the Ni-Co LDH. (b) The typical TEM image of the Ni-Co LDH (c) The typical SEM image of the NiO/Co<sub>3</sub>O<sub>4</sub>@C. (d) The typical TEM image of NiO/Co<sub>3</sub>O<sub>4</sub>@C. (e)HRTEM image of NiO/Co<sub>3</sub>O<sub>4</sub>@C. The cross section of NiO/Co<sub>3</sub>O<sub>4</sub>@C and NiO/Co<sub>3</sub>O<sub>4</sub>@C/CoS<sub>2</sub> (f, g).

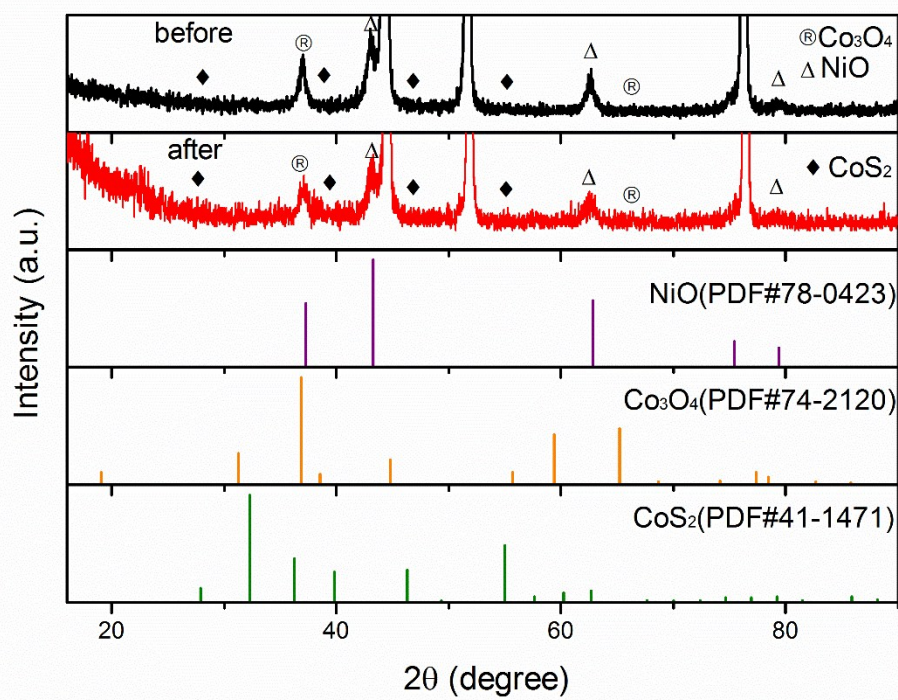

**Fig. S2** The XRD results of NiO/Co<sub>3</sub>O<sub>4</sub>@C/CoS<sub>2</sub> sample before and after 5000 cycles.

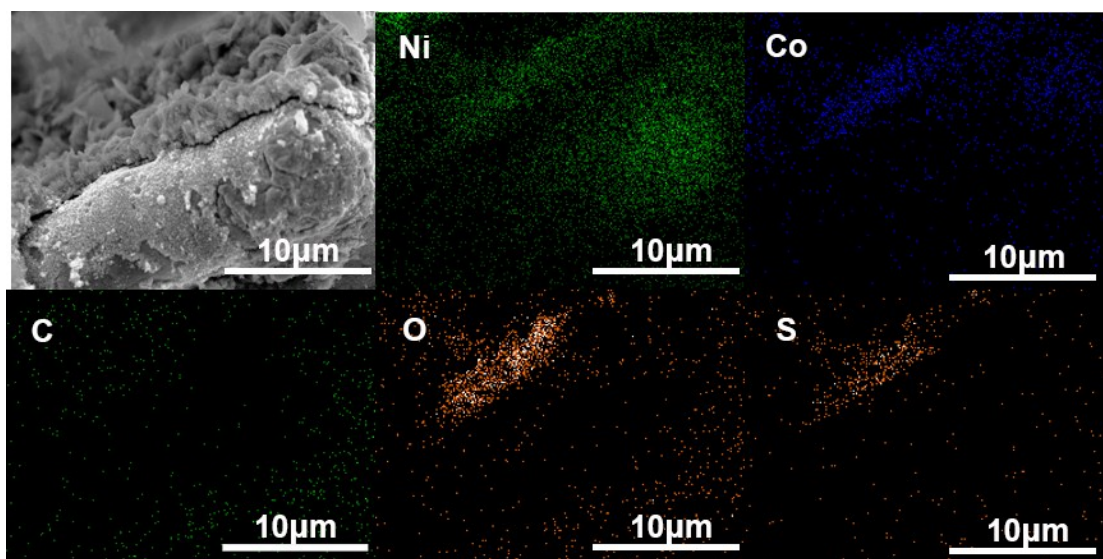

**Fig. S3** Area distribution of S, Co, O, C and Ni elements in NiO/Co<sub>3</sub>O<sub>4</sub>@C/CoS<sub>2</sub>.



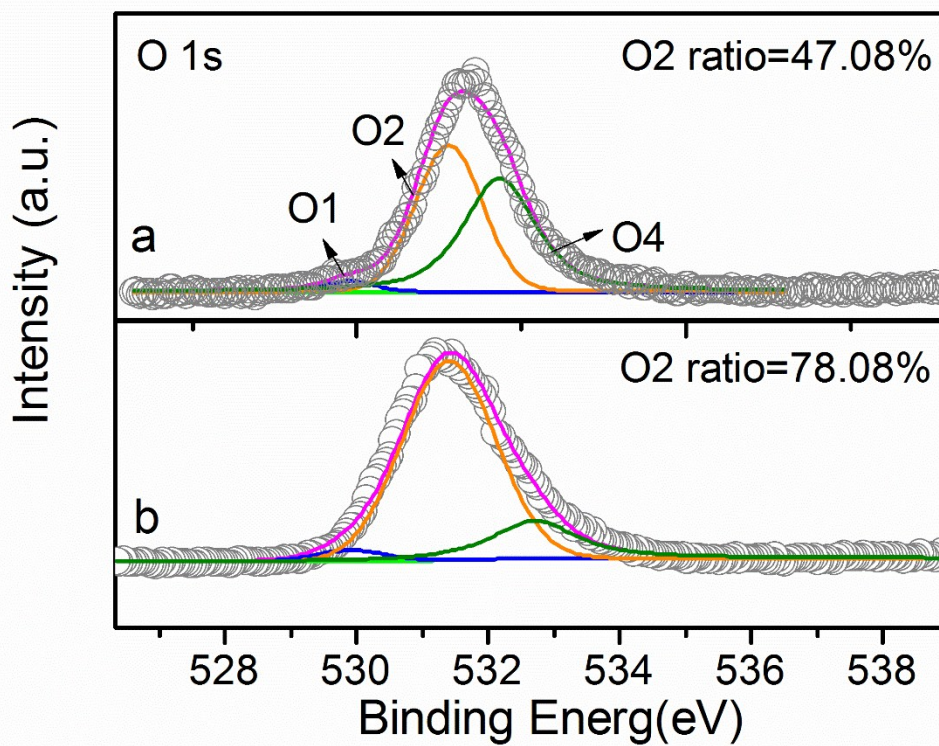

**Fig. S4** Fitted O 1s for NiO@Co<sub>3</sub>O<sub>4</sub>@C (a) and for NiO/Co<sub>3</sub>O<sub>4</sub>@C/CoS<sub>2</sub>(b).

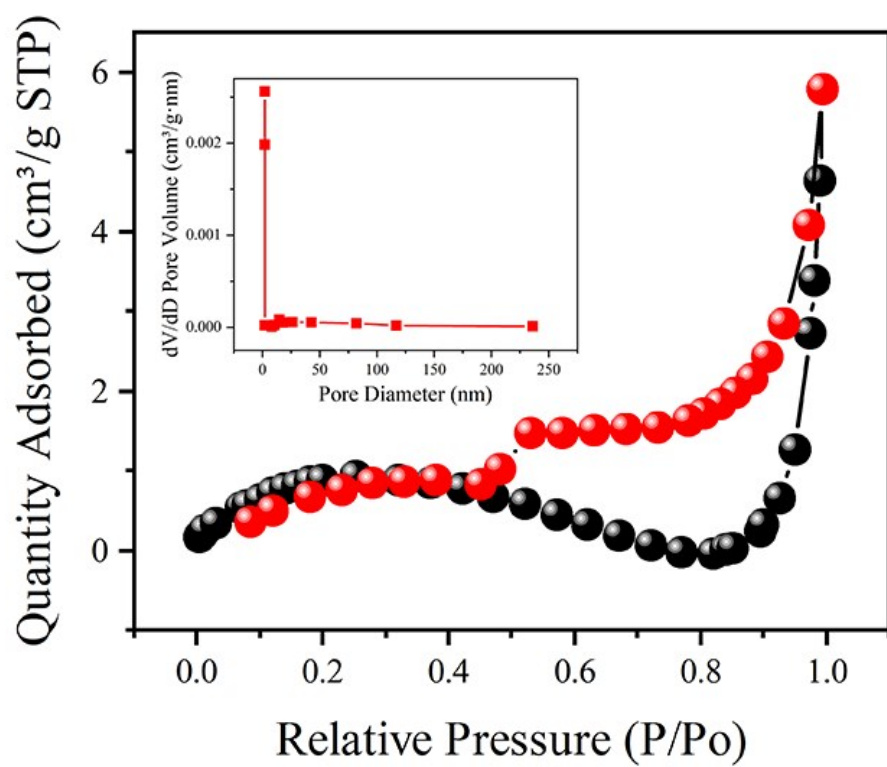

**Fig. S5** Nitrogen adsorption–desorption isotherms and pore-size distribution (inset) of nickel foam coated with NiO/Co<sub>3</sub>O<sub>4</sub>@C sample.

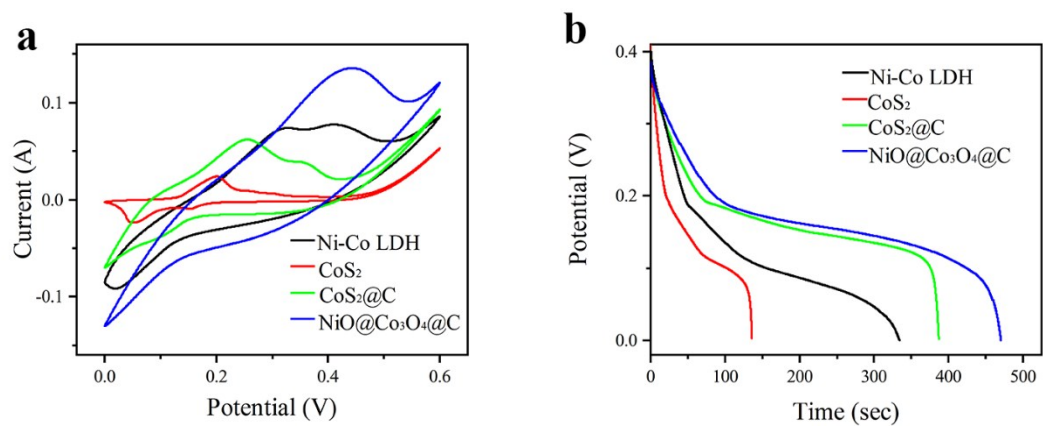

**Fig. S6** The CV (a) and GCD (b) curves of as-prepared samples at scan rate  $50 \text{ mV s}^{-1}$  and current density of  $2 \text{ A g}^{-1}$ .

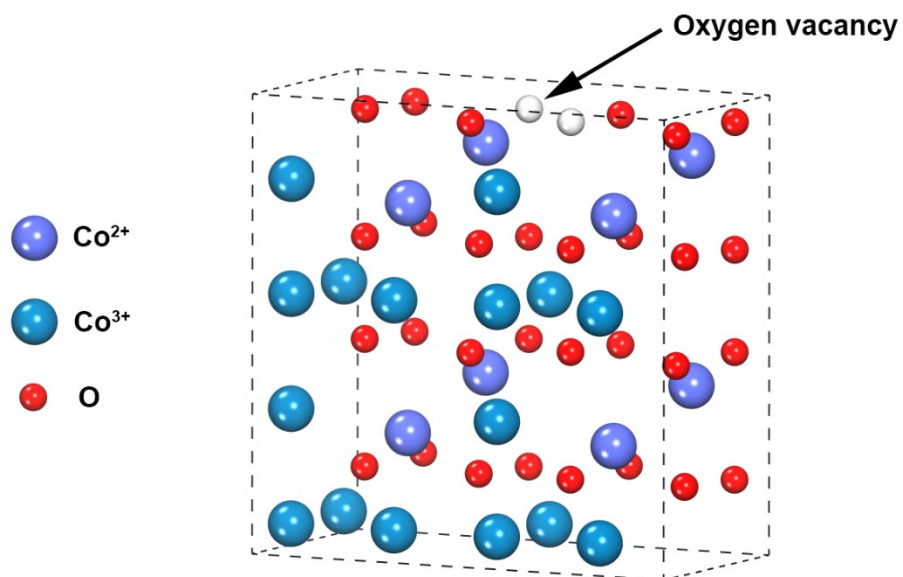

**Fig. S7** Illustration of more oxygen vacancies presence in the surface of  $\text{Co}_3\text{O}_4$  during the reaction of  $\text{Co}^{3+} + \text{S}_2\text{O}_3^{2-} + 5\text{H}_2\text{O} = 8\text{Co}^{2+} + 2\text{SO}_4^{2-} + 10\text{H}^+$ .



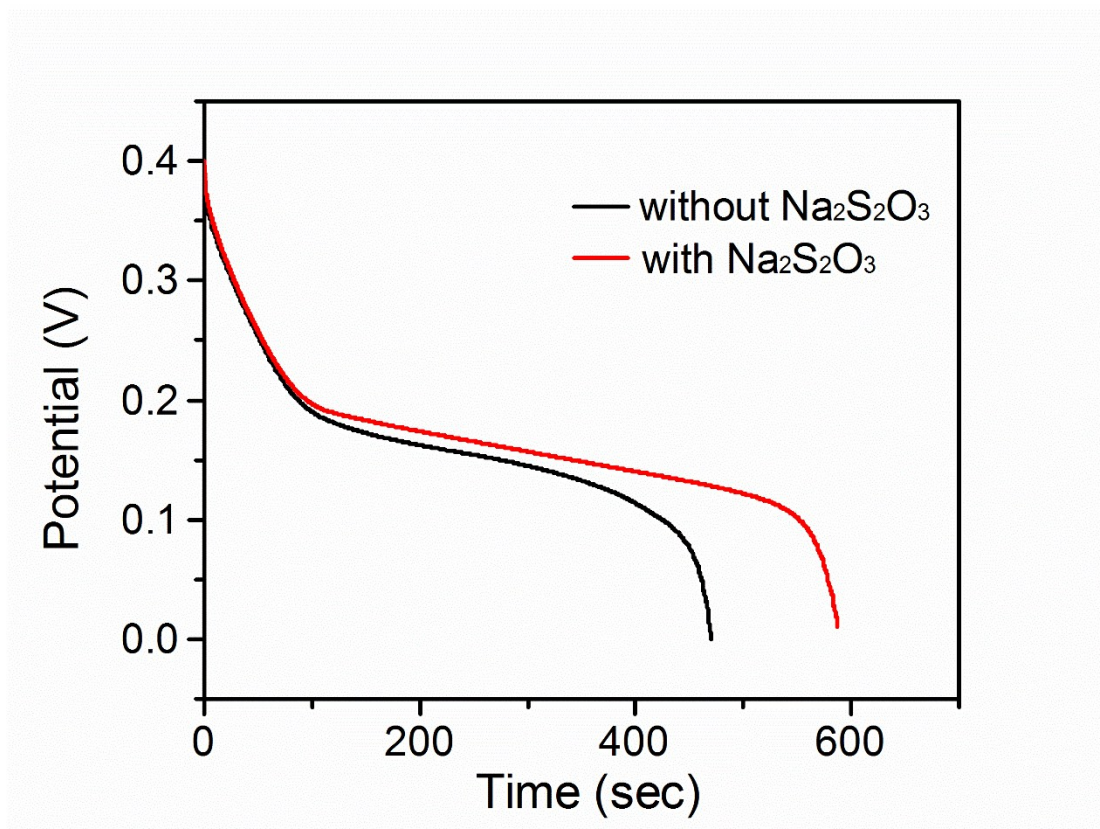

**Fig. S8** GCD curves of the samples with or without Na<sub>2</sub>S<sub>2</sub>O<sub>3</sub>.

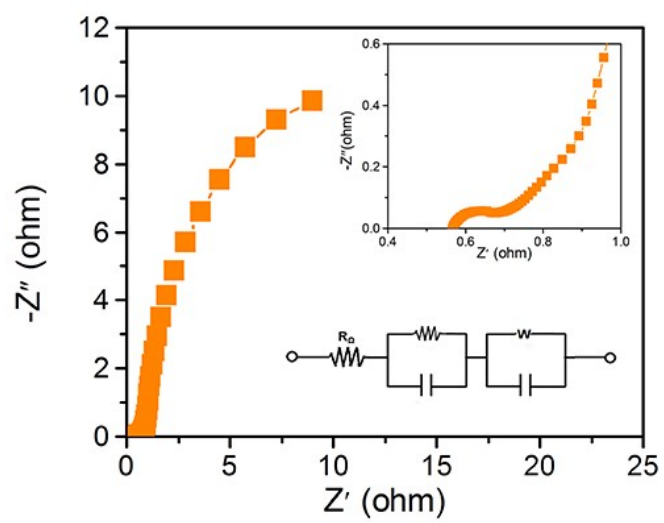

**Fig. S9** Nyquist plot of the NiO/Co<sub>3</sub>O<sub>4</sub>@C/CoS<sub>2</sub> electrode with its equivalent circuit (inset) used to fit the experimental data.

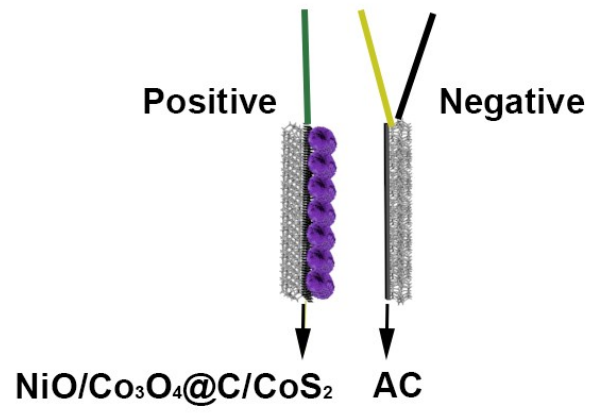

**Fig. S10** Hybrid device of  $\text{NiO/Co}_3\text{O}_4\text{@C/CoS}_2\text{//AC}$ .

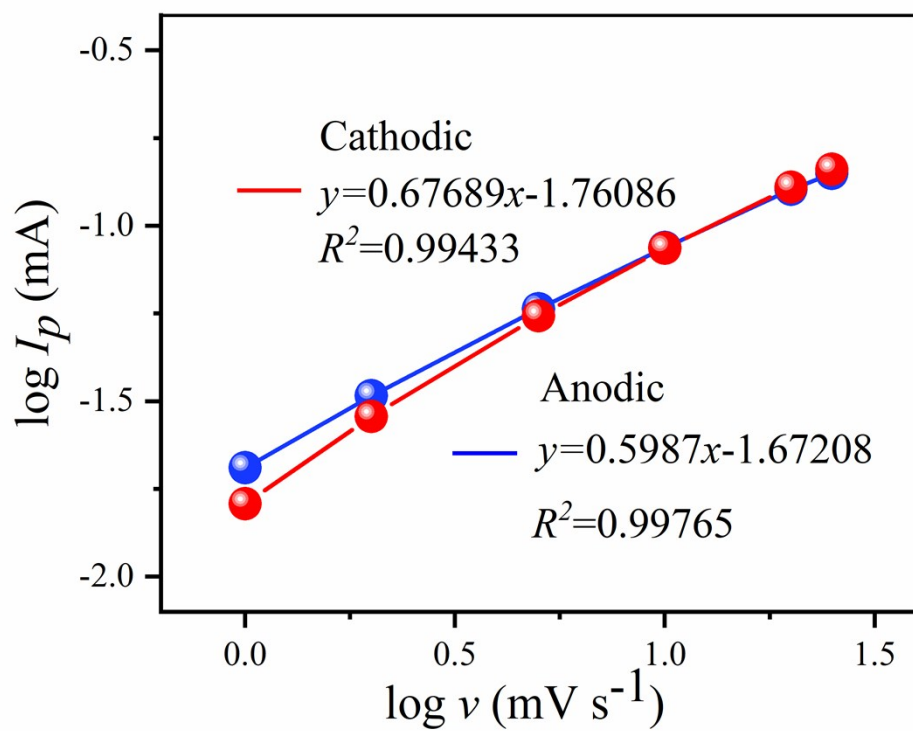

**Fig. S11** The electrochemical behavior of NiO/Co<sub>3</sub>O<sub>4</sub>@C/CoS<sub>2</sub>.

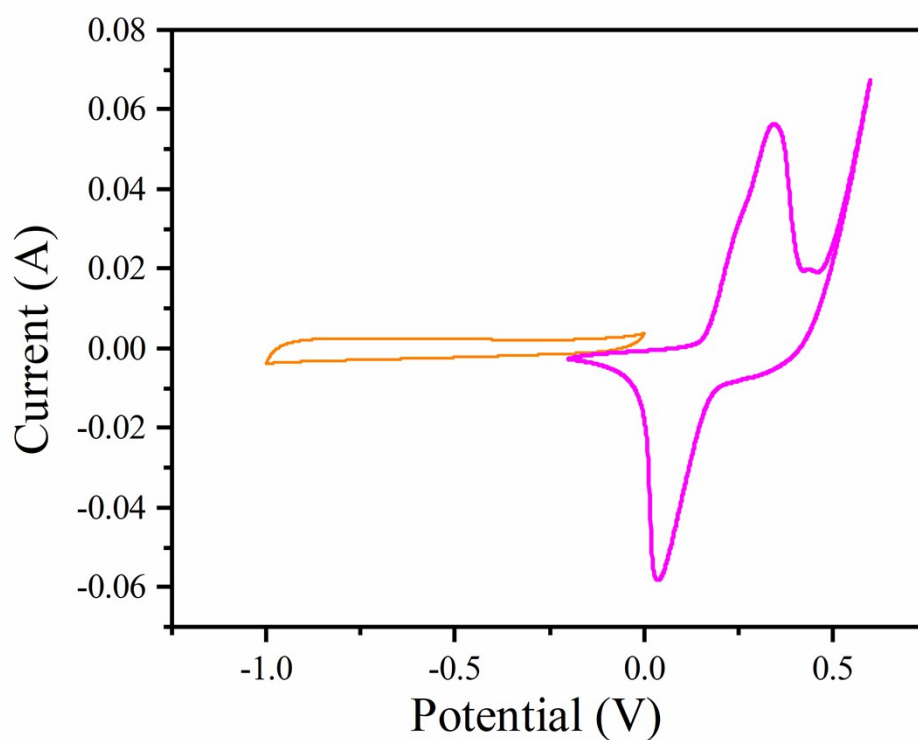

**Fig. S12** Cyclic voltammograms of the NiO/Co<sub>3</sub>O<sub>4</sub>@C/CoS<sub>2</sub> electrode and activated carbon (AC) electrodes performed in a three-electrode system in 6 M KOH solution at a scan rate of 5 mV s<sup>-1</sup>.

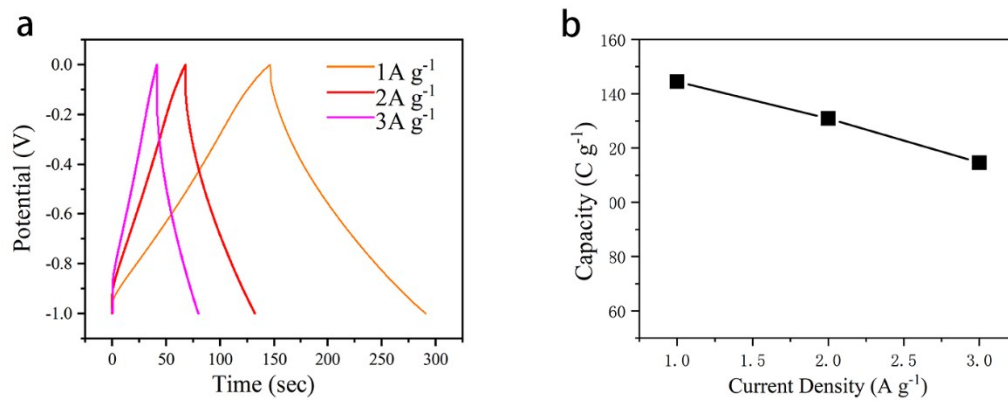

**Fig. S13** (a) GCD curves of AC electrode at various current densities. (b) Rate performance of the AC electrode at various scan rates from 1 A g<sup>-1</sup> to 3 A g<sup>-1</sup>.



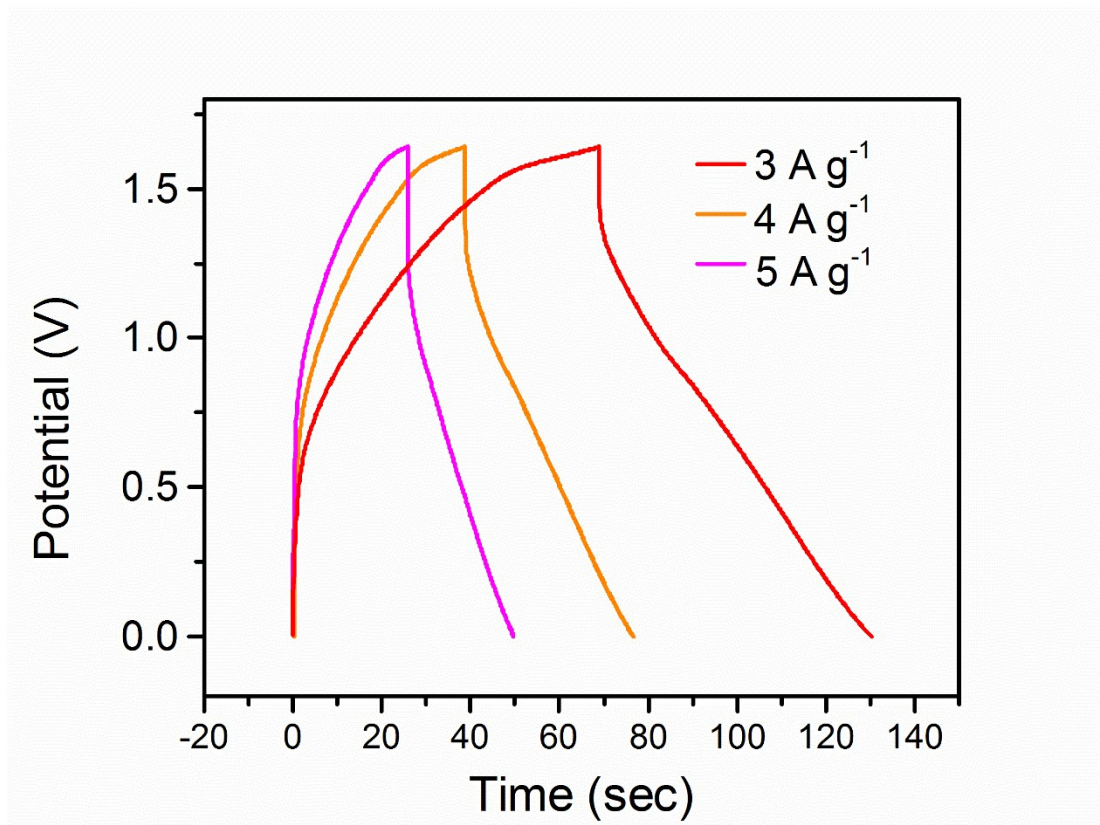

**Fig. S14** GCD curves of NiO/Co<sub>3</sub>O<sub>4</sub>@C/CoS<sub>2</sub>//AC hybrid device at different current densities.

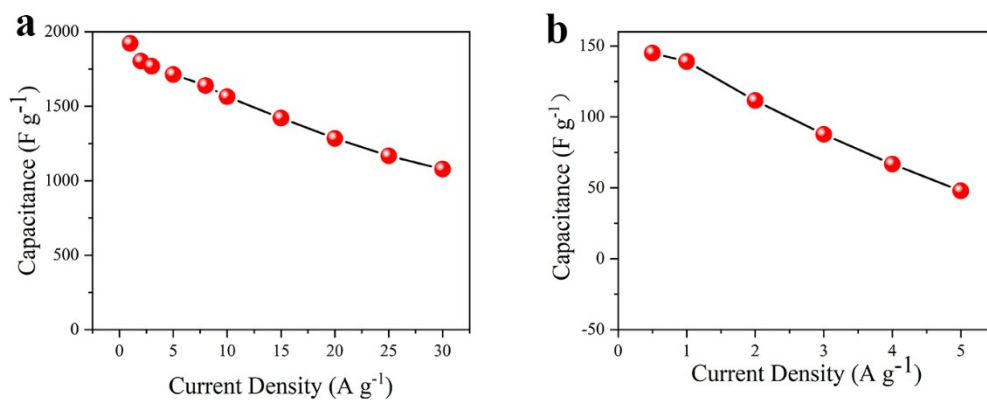

**Fig. S15** Rate performance of NiO/Co<sub>3</sub>O<sub>4</sub>@C/CoS<sub>2</sub> hybrid electrode at various scan rates from 1 A g<sup>-1</sup> to 30 A g<sup>-1</sup>; (b) Rate performance of NiO/Co<sub>3</sub>O<sub>4</sub>@C/CoS<sub>2</sub>//AC hybrid device at various scan rates from 0.5 A g<sup>-1</sup> to 5 A g<sup>-1</sup>.

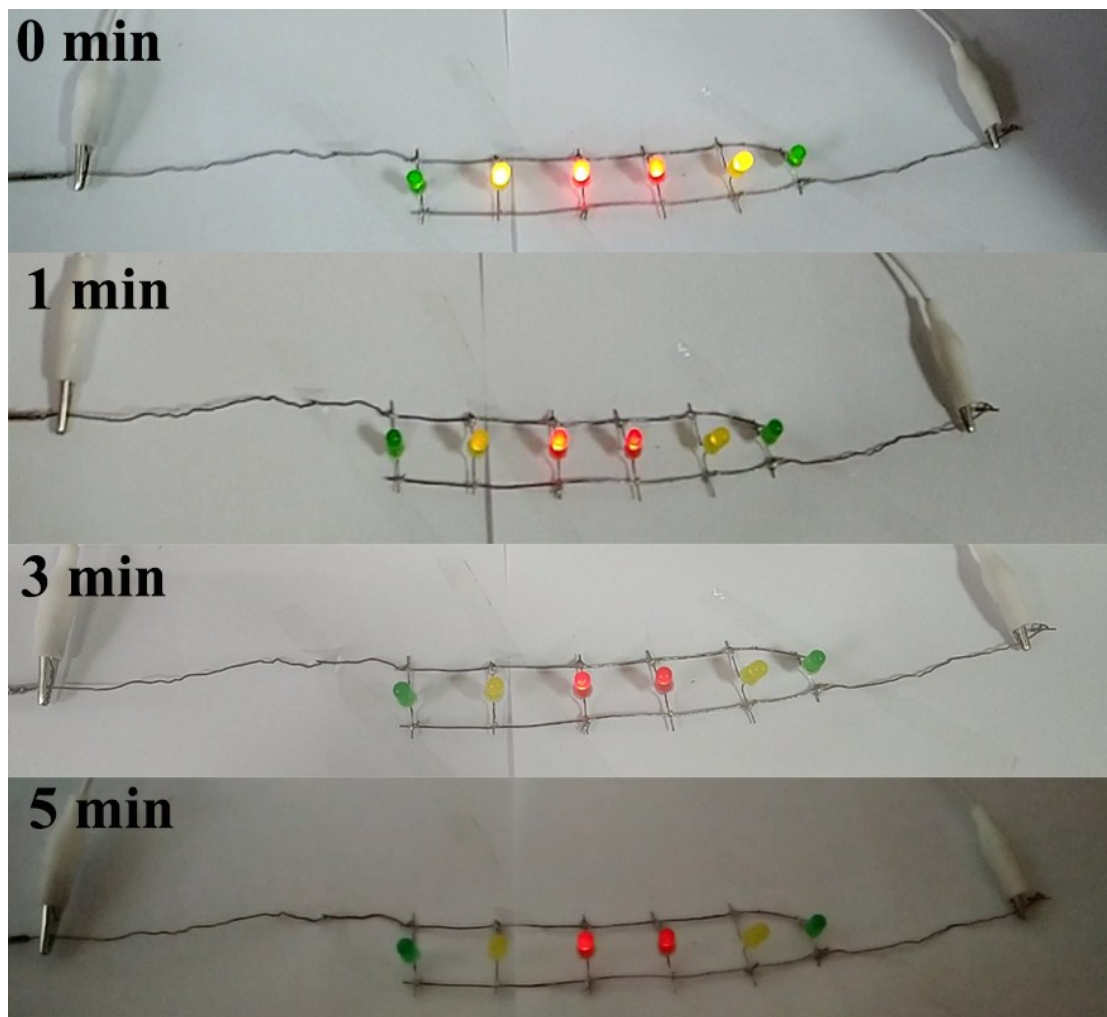

**Fig. S16** Real application of the two  $\text{NiO}/\text{Co}_3\text{O}_4@\text{C}/\text{CoS}_2//\text{AC}$  devices for lighting six LEDs at the same time.

**Table S1** Comparison of electrochemical performance of some reported electrode materials.

| Samples                                                                  | Highest capacity (F g <sup>-1</sup> )         | High rate performance                           | Ref       |
|--------------------------------------------------------------------------|-----------------------------------------------|-------------------------------------------------|-----------|
| G-Ni(OH) <sub>2</sub> /MoS <sub>2</sub>                                  | 1950 F g <sup>-1</sup> at 1 A g <sup>-1</sup> | 1400 F g <sup>-1</sup> at 1 A g <sup>-1</sup>   | 1         |
| NiCo <sub>2</sub> O <sub>4</sub> /NiO/<br>Co <sub>3</sub> O <sub>4</sub> | 1693 F g <sup>-1</sup> at 1 A g <sup>-1</sup> | ~1480 F g <sup>-1</sup> at 10 A g <sup>-1</sup> | 2         |
| Co <sub>3</sub> O <sub>4</sub> -<br>NiO/graphene foam                    | 783 F g <sup>-1</sup> at 1 A g <sup>-1</sup>  | 583 F g <sup>-1</sup> at 10 A g <sup>-1</sup>   | 3         |
| MnO <sub>2</sub> @NiCo-<br>LDH/CoS <sub>2</sub>                          | 1547 F g <sup>-1</sup> at 1 A g <sup>-1</sup> | 1189 F g <sup>-1</sup> at 10 A g <sup>-1</sup>  | 4         |
| CoO/Co-Cu-S                                                              | 2300 F g <sup>-1</sup> at 2 A g <sup>-1</sup> | ~1702 F g <sup>-1</sup> at 30 A g <sup>-1</sup> | 5         |
| NiO/Co <sub>3</sub> O <sub>4</sub> @C/<br>CoS <sub>2</sub>               | 1024 C g <sup>-1</sup> at 1A g <sup>-1</sup>  | ~759 C g <sup>-1</sup> at 30 A g <sup>-1</sup>  | This work |

1. C. Zhao, R. Wang, Y. Zhang, L. Chen, T. Li, X. Deng, P. Zhang and X. Lu, *Electrochim. Acta*, 2019, **320**, 134591.
2. X. Feng, Y. Huang, C. Li, X. Chen, S. Zhou, X. Gao and C. Chen, *Chem. Eng. J.*, 2019, **368**, 51-60.
3. P. Wang, H. Zhou, C. Meng, Z. Wang, K. Akhtar and A. Yuan, *Chem. Eng. J.*, 2019, **369**, 57-63.
4. X. Wang, F. Huang, F. Rong, P. He, R. Que and S. P. Jiang, *J. Mater. Chem. A*, 2019, **7**, 12018-12028.
5. W. Lu, J. Shen, P. Zhang, Y. Zhong, Y. Hu and X. W. D. Lou, *Angew Chem. Int. Ed. Engl.*, 2019, **58**, 15441-15447.
